# Supplementary material
Source: PubMed Central journal article supplement (PMC4102655)
Supplement: NIHMS597281-supplement-3.pdf [file NIHMS597281-supplement-3.pdf]

## **Supplemental Figure 1**

### **Endogenous cyclin D1 mediates both E2 and EDC-induced $\gamma$ H2AX in MCF-7 cells.**

MCF-7 cells were transfected with cyclin D1 siRNA or control siRNA. 48 hrs later cells were exposed to DNA damage by UV (100 J/m<sup>2</sup>) in the presence of 10 nM E<sub>2</sub> or vehicle ethanol control, and 10 nM EDC or vehicle dendrimer control. 24 hrs later  $\gamma$ H2AX was detected by immunofluorescence and the percentage of  $\gamma$ H2AX positive cells was shown.
