# Supplementary material
Source: PubMed Central journal article supplement (PMC4102655)

# Supplemental Figure 1

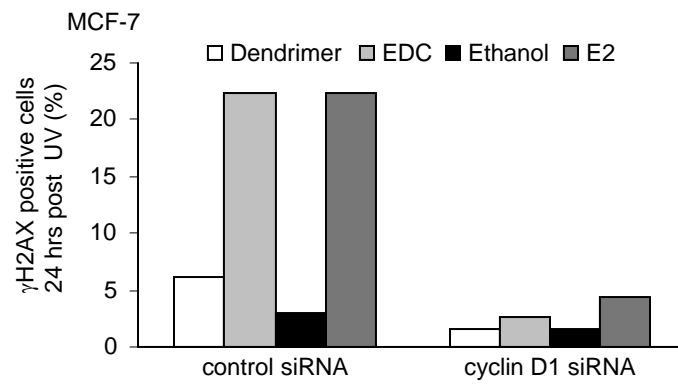

Supplement: NIHMS597281-supplement-1.pdf [file NIHMS597281-supplement-1.pdf]
